# Supplementary material
Source: MDPI journal article supplement (https://www.mdpi.com/1424-8247/15/3/331)

Figure S1 –<sup>1</sup>H-<sup>13</sup>C Heteronuclear Multiple Bond Correlation (HMBC) Spectroscopy for carajurin

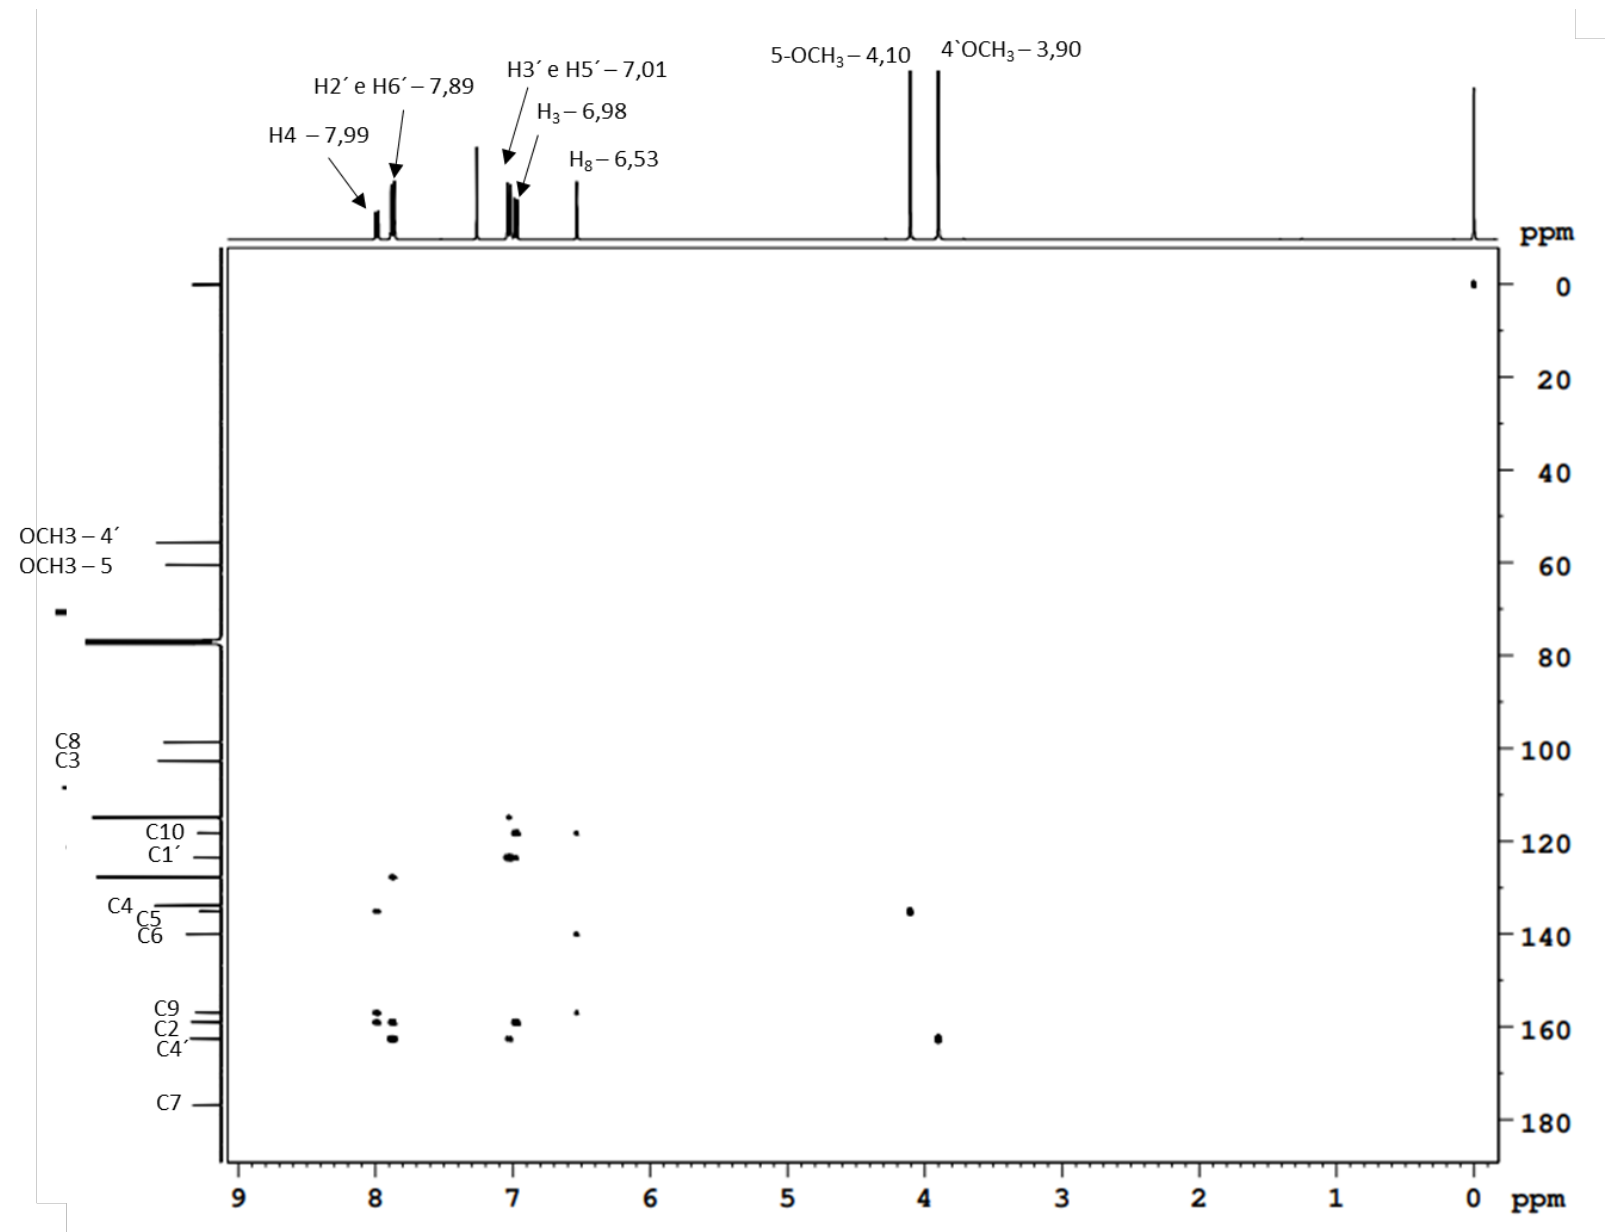

Figure S2 – Expansion of the  $^1\text{H}$ - $^{13}\text{C}$  Heteronuclear Multiple Bond Correlation (HMBC) Spectroscopy for carajurin

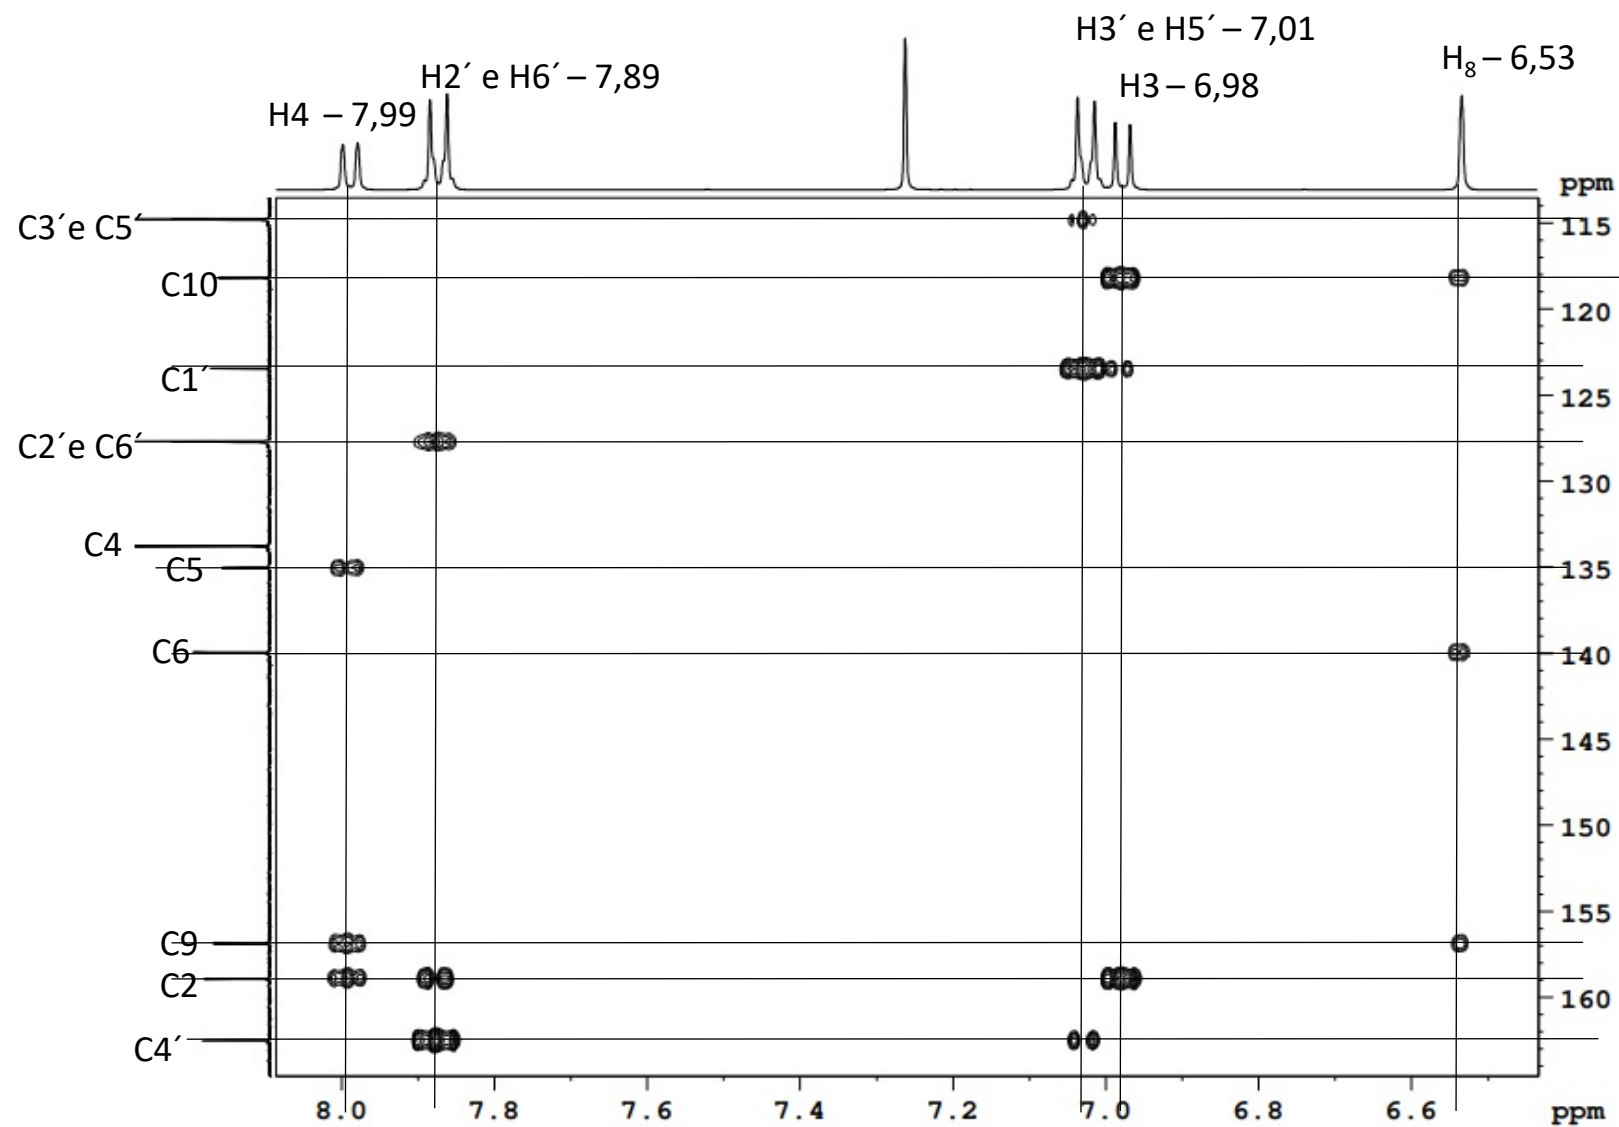

Figure S3 –<sup>1</sup>H-<sup>13</sup>C Heteronuclear Single Quantum Correlation (HSQC) Spectroscopy for carajurin

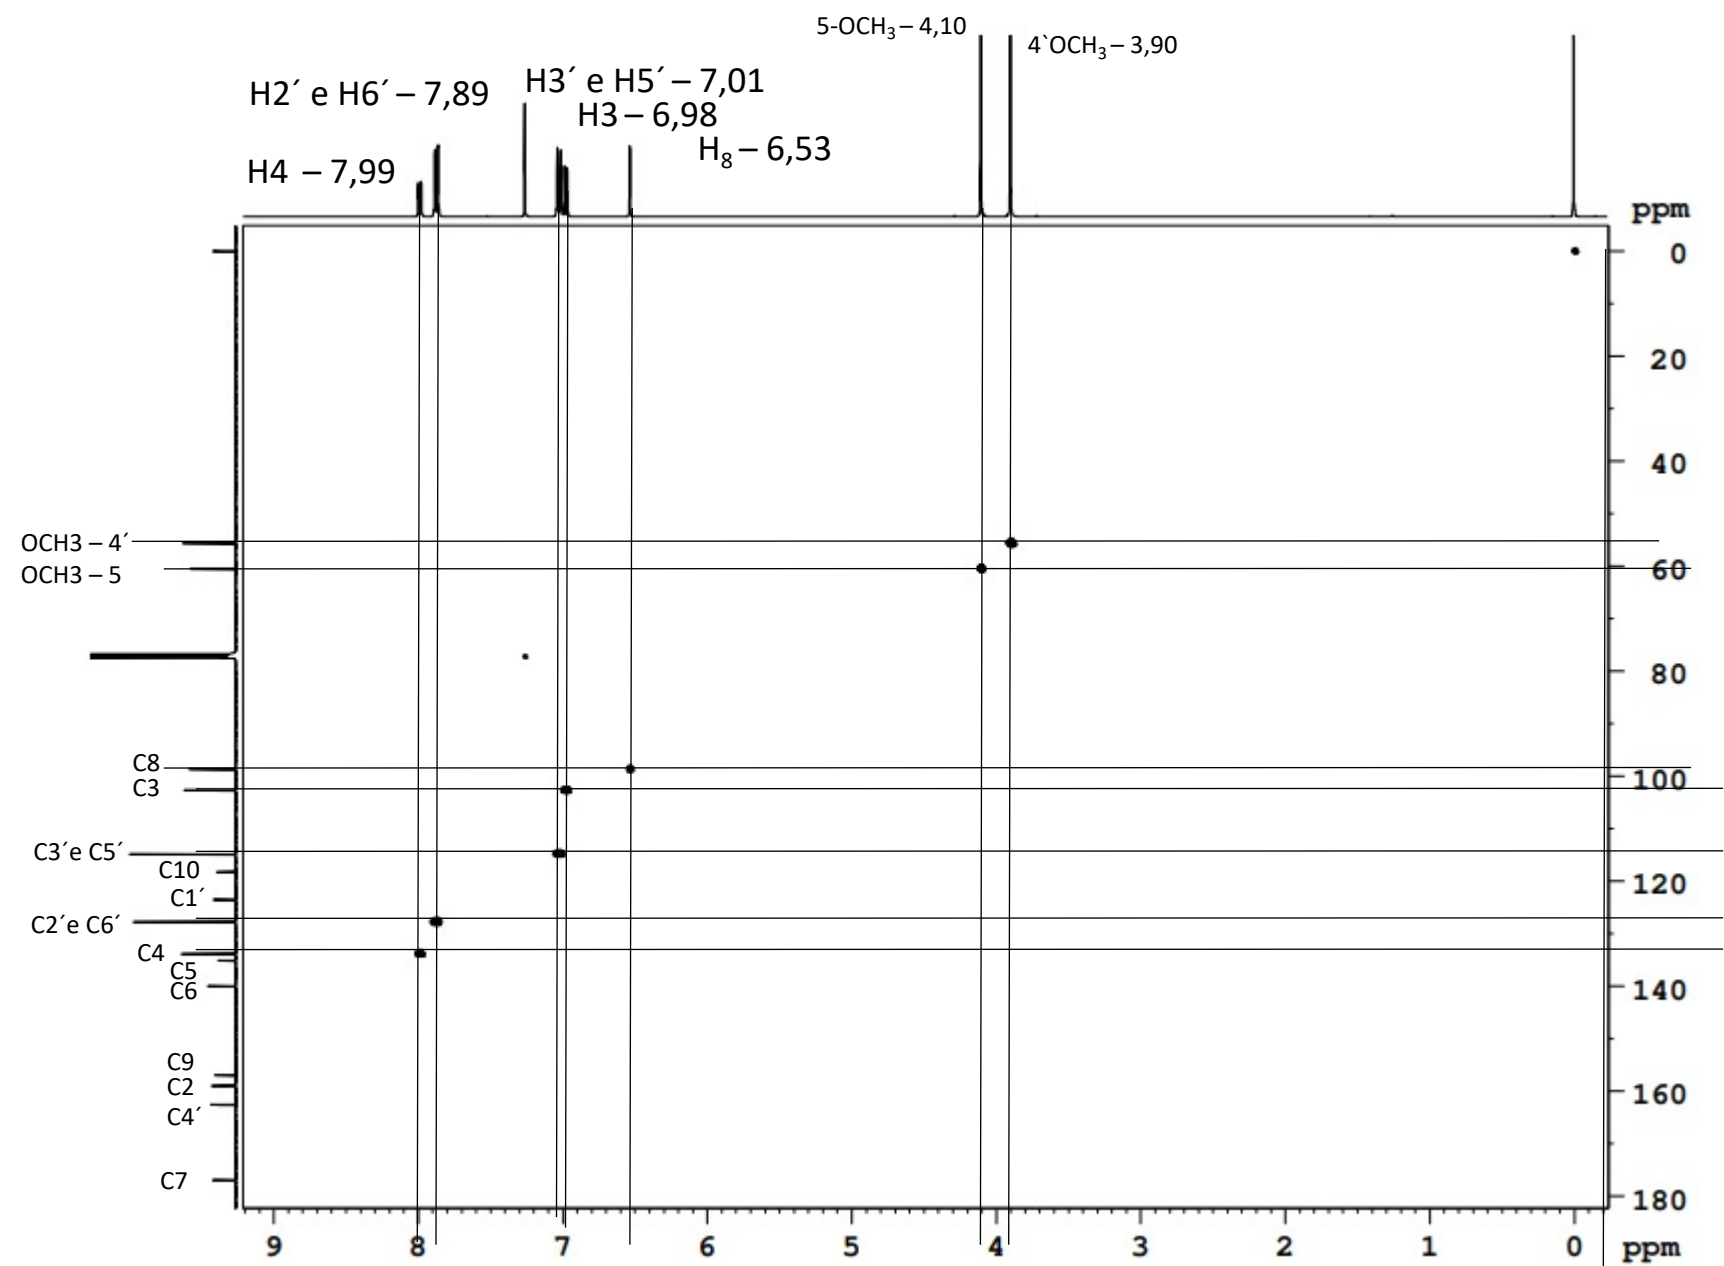

Figure S4 –<sup>1</sup>H-<sup>1</sup>H Homonuclear Correlation (COSY) Spectroscopy for carajurin

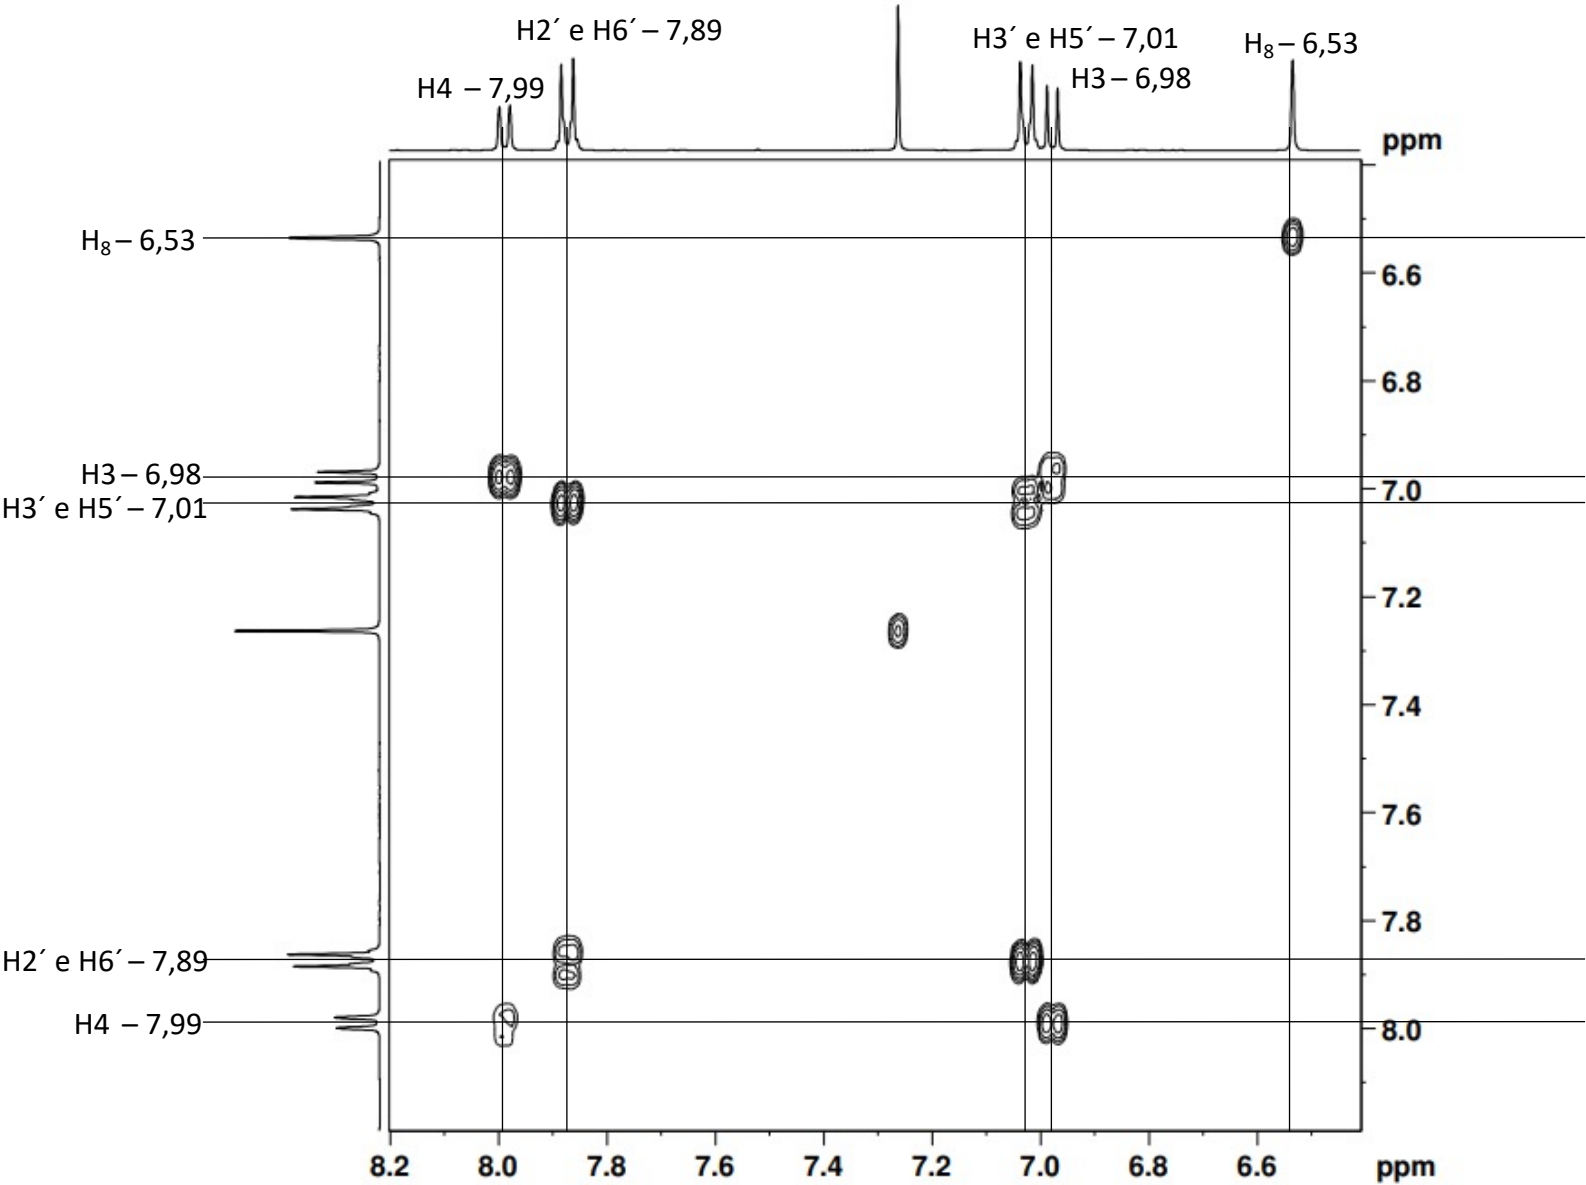

Supplement: s1 [file s1]
